# Supplementary material for: Artemisinin Confers Cytoprotection toward Hydrogen Peroxide-Induced Cell Apoptosis in Retinal Pigment Epithelial Cells in Correlation with the Increased Acetylation of Histone H4 at Lysine 8
Source: MDPI journal article supplement (doi:10.3390/molecules29081789), 2024-04-15
Supplement: s1 [file s1]

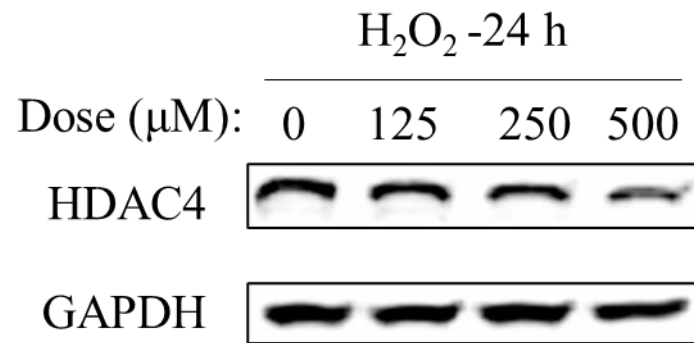

Figure S1. Representative western blotting image of HDAC4 protein level. The D407 cells were treated with different concentrations of  $\text{H}_2\text{O}_2$  (125, 250, or 500  $\mu\text{M}$ ) for 24 h. HDAC4 and GAPDH protein levels were detected by western blotting.
